# Supplementary material for: Chemical Composition and Source Apportionment of PM2.5 in a Border City in Southwest China
Source: MDPI journal article supplement (doi:10.3390/atmos13010007), 2021-12-21
Supplement: s1 [file s1]

## Supplementary Materials:

Jianwu Shi <sup>1</sup>, Chenyang Zhao <sup>1</sup>, Zhijun Wang <sup>1</sup>, Xiaochen Pang <sup>1</sup>, Yaoqian Zhong <sup>1</sup>, Xinyu Han <sup>2,\*</sup> and Ping Ning <sup>1</sup>

**Table S1.** Sampling time and weather conditions at three sampling sites in Baoshan.

| Season     | Sampling time                 | Sampling sites |     |    | Weather       | Concentration of PM <sub>2.5</sub> (μg·m <sup>-3</sup> ) | Air temperature(°C) |
|------------|-------------------------------|----------------|-----|----|---------------|----------------------------------------------------------|---------------------|
|            |                               | EMS            | BSC | AA |               |                                                          |                     |
| Wet season | 13/6/2016-14/6/2016,(22±1h)   | Y              | Y   | Y  | Light rain    | 20.87                                                    | 18-24               |
|            | 14/6/2016-15/6/2016,(22±1h)   | Y              | Y   | Y  | Light rain    | 21.24                                                    | 17-25               |
|            | 15/6/2016-16/6/2016,(22±1h)   | Y              | Y   | Y  | Light rain    | 17.19                                                    | 18-26               |
|            | 16/6/2016-17/6/2016,(22±1h)   | N              | N   | N  | Light rain    | -                                                        | 18-23               |
|            | 17/6/2016-18/6/2016,(22±1h)   | Y              | Y   | Y  | Light rain    | 16.53                                                    | 18-24               |
|            | 18/6/2016-19/6/2016,(22±1h)   | Y              | Y   | Y  | Shower        | 7.03                                                     | 18-26               |
|            | 19/6/2016-20/6/2016,(23±1h)   | Y              | Y   | Y  | Light rain    | 7.05                                                     | 18-21               |
|            | 20/6/2016-21/6/2016,(22±1h)   | Y              | Y   | Y  | Light rain    | 8.05                                                     | 19-24               |
|            | 21/6/2016-22/6/2016,(22±1h)   | Y              | Y   | Y  | Light rain    | 7.49                                                     | 19-22               |
|            | 22/6/2016-23/6/2016,(22±1h)   | Y              | Y   | Y  | Moderate rain | 8.88                                                     | 18-22               |
|            | 23/6/2016-24/6/2016,(22±1h)   | Y              | Y   | Y  | Light rain    | 11.56                                                    | 19-25               |
|            | 23/6/2016-24/6/2016,(22±1h)   | Y              | Y   | Y  | Light rain    | 11.43                                                    | 19-23               |
|            | 25/6/2016-26/6/2016,(22±1h)   | Y              | Y   | Y  | Light rain    | 10.26                                                    | 19-27               |
|            | 26/6/2016-27/6/2016,(22±1h)   | Y              | Y   | Y  | Light rain    | 13.55                                                    | 19-27               |
|            | 27/6/2016-28/6/2016,(22±1h)   | Y              | Y   | Y  | Light rain    | 13.86                                                    | 19-27               |
|            | 9/11/2016-10/11/2016,(22±1h)  | Y              | Y   | Y  | Cloudy        | 24.56                                                    | 14-23               |
|            | 10/11/2016-11/11/2016,(22±1h) | Y              | Y   | Y  | Cloudy        | 36.43                                                    | 12-23               |
|            | 11/11/2016-12/11/2016,(22±1h) | Y              | Y   | Y  | Clear         | 32.24                                                    | 9-23                |
|            | 12/11/2016-13/11/2016,(22±1h) | Y              | Y   | Y  | Cloudy        | 24.21                                                    | 10-23               |
|            | 13/11/2016-14/11/2016,(22±1h) | Y              | Y   | Y  | Cloudy        | 32.18                                                    | 10-22               |
| Dry season | 14/11/2016-15/11/2016,(22±1h) | Y              | Y   | Y  | Cloudy        | 38.77                                                    | 9-23                |
|            | 15/11/2016-16/11/2016,(22±1h) | Y              | Y   | Y  | Cloudy        | 32.82                                                    | 9-23                |
|            | 16/11/2016-17/11/2016,(22±1h) | Y              | Y   | Y  | Cloudy        | 39.53                                                    | 8-23                |
|            | 17/11/2016-18/11/2016,(22±1h) | Y              | Y   | Y  | Cloudy        | 36.56                                                    | 8-22                |
|            | 18/11/2016-19/11/2016,(22±1h) | N              | N   | N  | Clear         | -                                                        | 8-23                |
|            | 19/11/2016-20/11/2016,(22±1h) | Y              | Y   | Y  | Clear         | 27.50                                                    | 6-22                |
|            | 20/11/2016-21/11/2016,(22±1h) | Y              | Y   | Y  | Clear         | 33.47                                                    | 6-22                |
|            | 21/11/2016-22/11/2016,(22±1h) | Y              | Y   | Y  | Clear         | 45.03                                                    | 6-22                |
|            | 22/11/2016-23/11/2016,(22±1h) | Y              | Y   | Y  | Clear         | 41.01                                                    | 6-22                |
|            | 23/11/2016-24/11/2016,(22±1h) | Y              | Y   | Y  | Clear         | 38.04                                                    | 6-21                |
|            | Y:Sampling<br>N:No sampling   |                |     |    |               |                                                          |                     |

**Table S2.** Percent of bootstrap factors mapped back to the original PMF factors from the four-factor PMF solution in the wet season.

| Factor                                                   | % Bootstrap factors mapped to original PMF factors |
|----------------------------------------------------------|----------------------------------------------------|
| Road dust                                                | 90                                                 |
| Biomass combustion and sea salt                          | 90                                                 |
| Metal smelting Road dust                                 | 99                                                 |
| Fossil fuel combustion and secondary inorganic particles | 88                                                 |

As shown in the figure 1, Output of the bootstrapping analysis consisting of box whisker plots of species for each profile: a) Road dust, b) Biomass combustion and sea salt, c) Metal smelting and d) Fossil fuel combustion and secondary inorganic particles; The box shows the interquartile range (25th-75th percentile) of the bootstrap runs. The horizontal green line represents the median bootstrap run and the red crosses represent values outside the interquartile range. The base run is shown as a blue box for reference. In this study, 100 bootstrap runs were performed for the final PMF results.

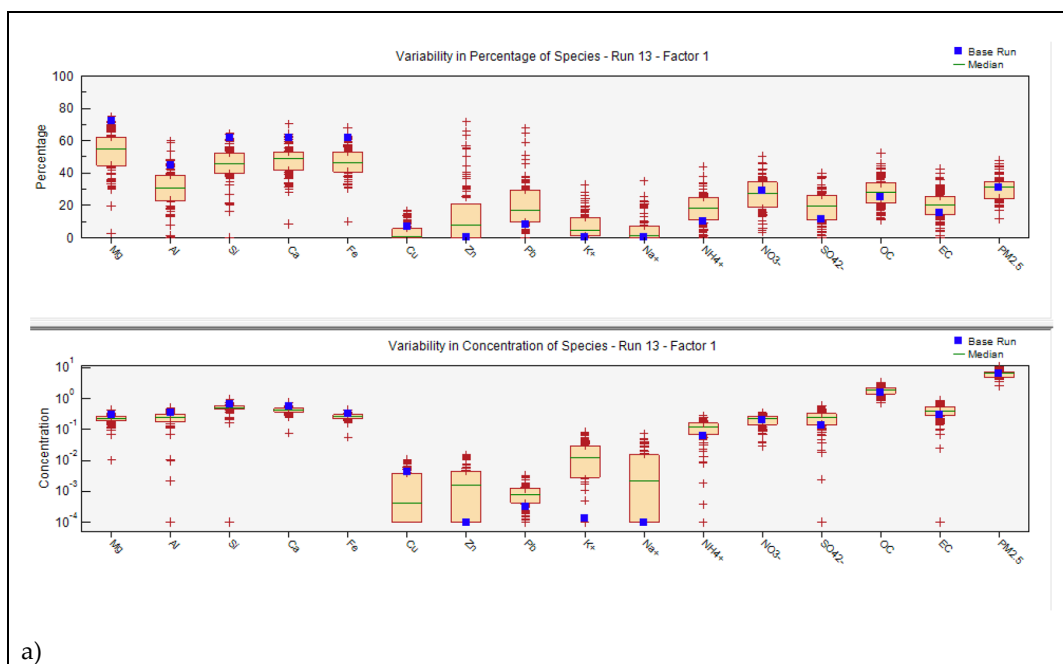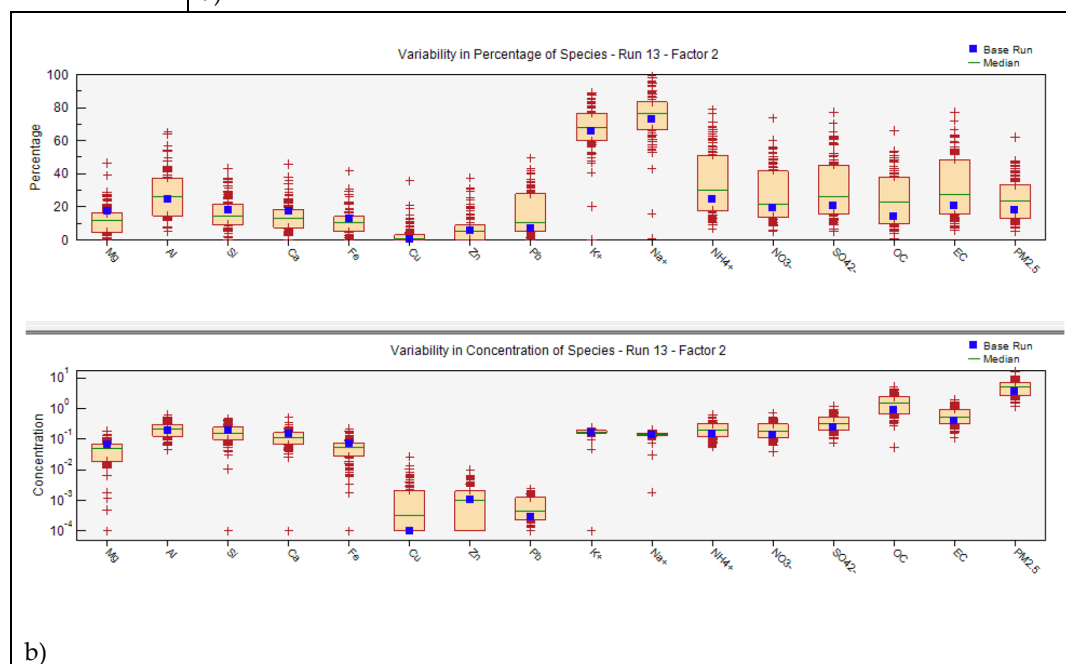

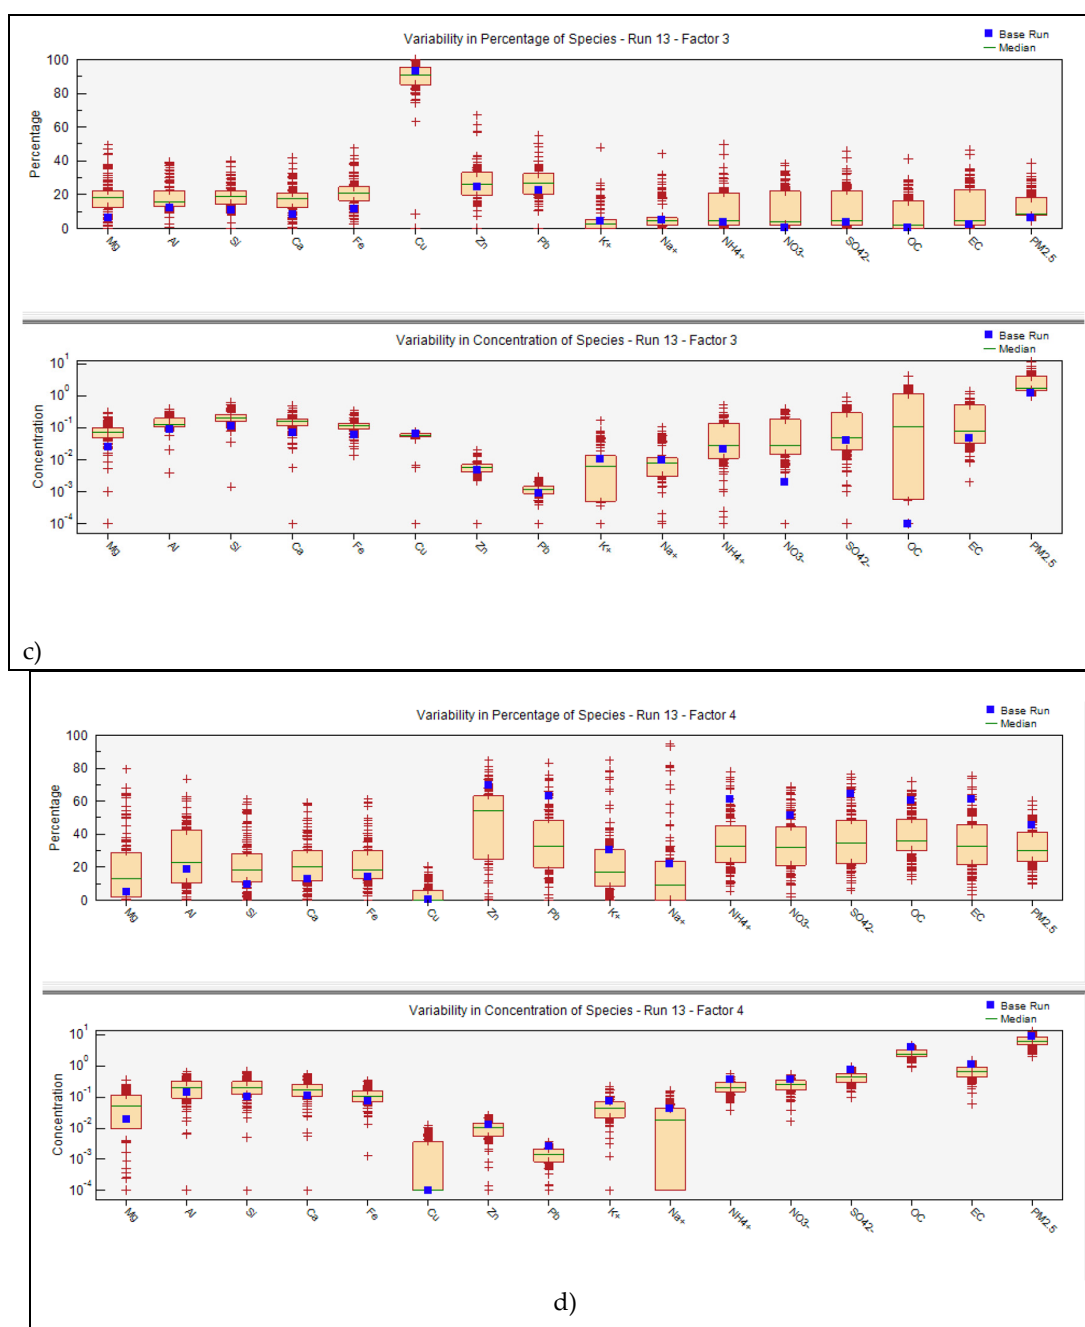

**Figure S1.** Output of the bootstrapping analysis in the wet season.

**Table S3.** Percent of bootstrap factors mapped back to the original PMF factors from the four-factor PMF solution in the dry season.

| Factor                 | % Bootstrap factors mapped to original PMF factors |
|------------------------|----------------------------------------------------|
| fossil fuel combustion | 97                                                 |

|                                                         |     |
|---------------------------------------------------------|-----|
| biomass combustion and<br>secondary inorganic particles | 100 |
| metal smelting                                          | 85  |
| road dust                                               | 97  |

As shown in the figure 2, Output of the bootstrapping analysis consisting of box whisker plots of species for each profile: a) Fossil fuel combustion, b) Biomass combustion and secondary inorganic particles, c) Metal smelting and d) Road dust ; The box shows the interquartile range (25th-75th percentile) of the bootstrap runs. The horizontal green line represents the median bootstrap run and the red crosses represent values outside the interquartile range. The base run is shown as a blue box for reference. In this study, 100 bootstrap runs were performed for the final PMF results.

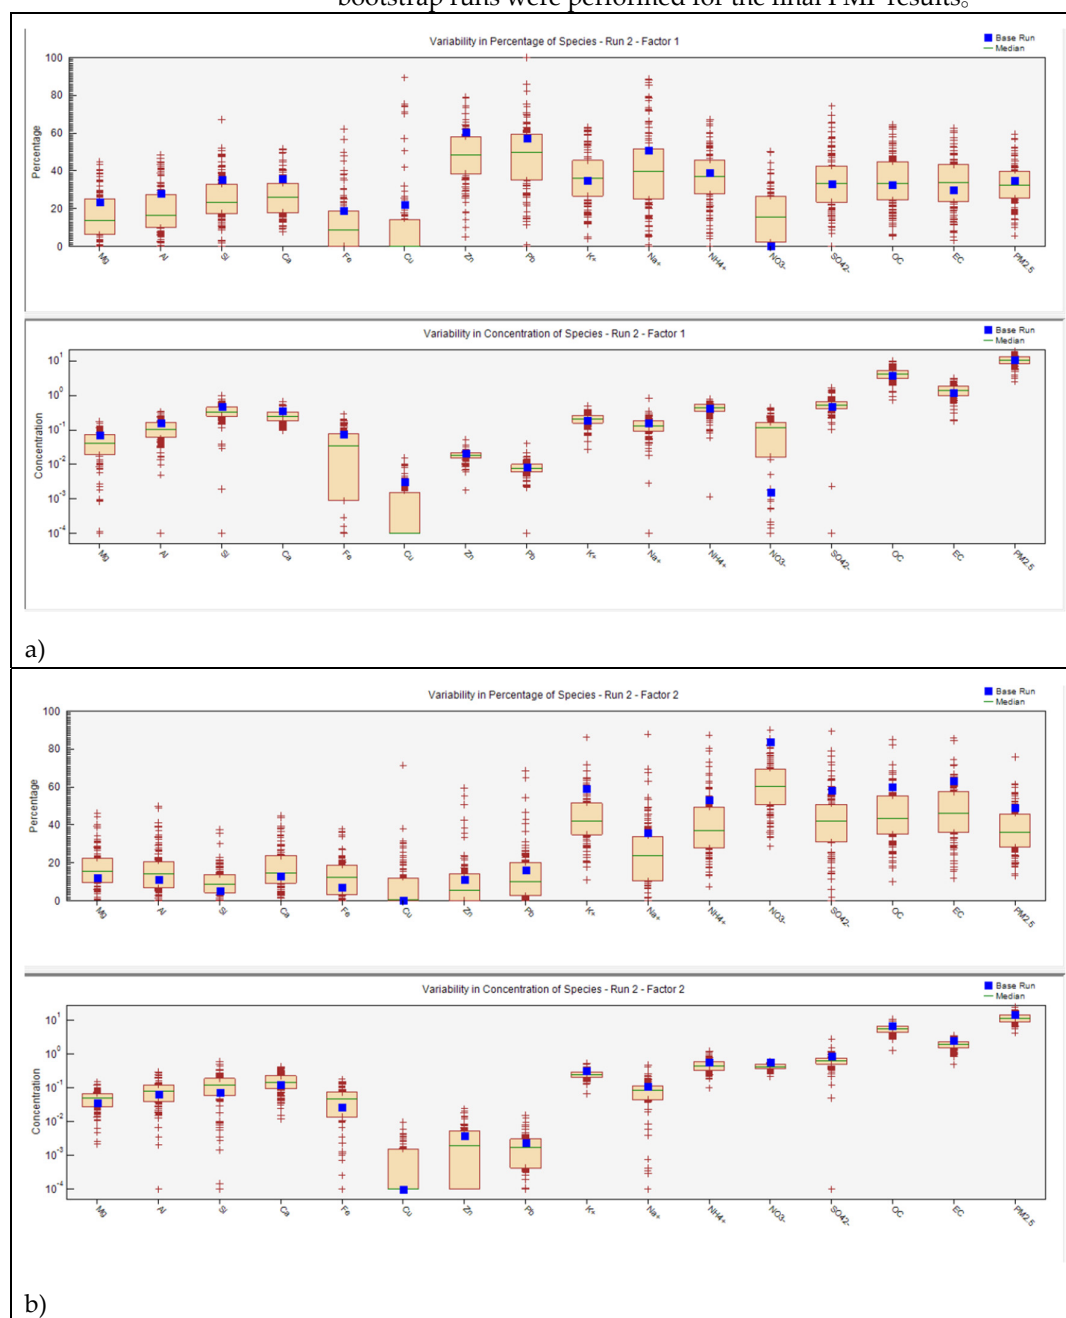

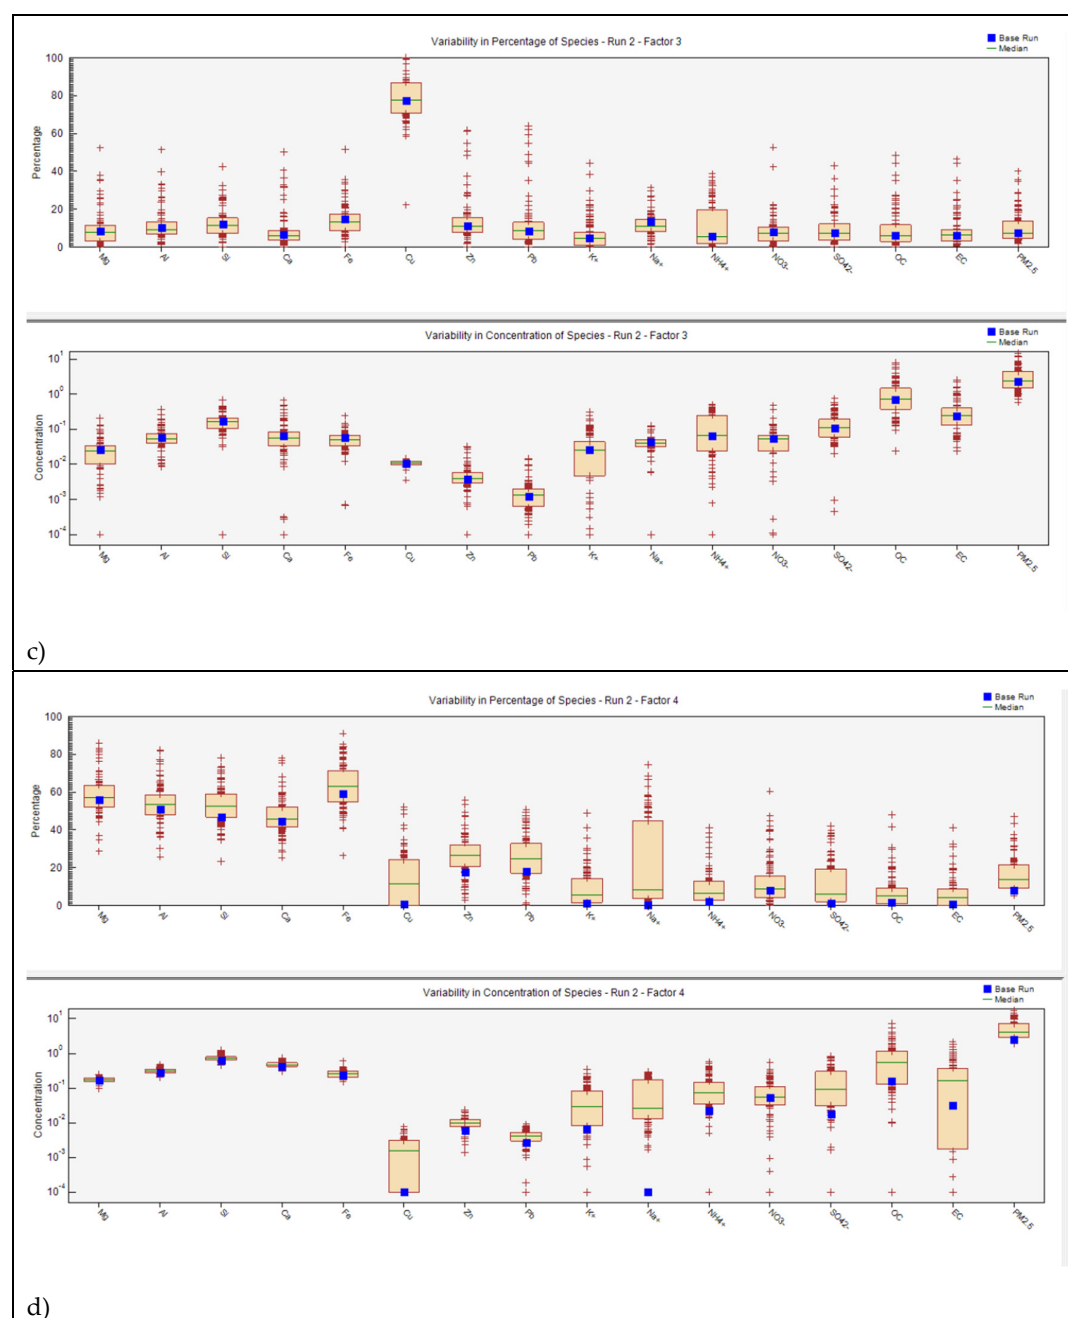

**Figure S2.** Output of the bootstrapping analysis in the dry season.
